# Supplementary material for: Theoretical Evaluation of Multi-Breed Genomic Prediction in Chinese Indigenous Cattle
Source: MDPI journal article supplement (doi:10.3390/ani9100789), 2019-10-11
Supplement: s1 [file s1]

Table 1. Accuracies of within breed prediction.

| Trait      | Heritability | Validation |      |      |      |      |      |      |      |      |      |
|------------|--------------|------------|------|------|------|------|------|------|------|------|------|
|            |              | CDMC       | XZC  | MGC  | YHC  | PWC  | LSC  | ZTC  | HNC  | NDC  | WSC  |
| Strategy 1 | 0.1          | 0.28       | 0.32 | 0.35 | 0.32 | 0.28 | 0.30 | 0.28 | 0.29 | 0.27 | 0.32 |
|            | 0.3          | 0.47       | 0.48 | 0.54 | 0.52 | 0.51 | 0.50 | 0.51 | 0.46 | 0.37 | 0.49 |
|            | 0.6          | 0.63       | 0.66 | 0.72 | 0.69 | 0.67 | 0.69 | 0.67 | 0.61 | 0.59 | 0.67 |
| Strategy 2 | 0.1          | 0.29       | 0.28 | 0.35 | 0.29 | 0.35 | 0.30 | 0.26 | 0.23 | 0.23 | 0.30 |
|            | 0.3          | 0.49       | 0.43 | 0.53 | 0.46 | 0.47 | 0.47 | 0.51 | 0.41 | 0.44 | 0.45 |
|            | 0.6          | 0.68       | 0.62 | 0.68 | 0.63 | 0.64 | 0.64 | 0.66 | 0.59 | 0.59 | 0.68 |
| Strategy 3 | 0.1          | 0.27       | 0.29 | 0.37 | 0.32 | 0.31 | 0.31 | 0.30 | 0.27 | 0.31 | 0.32 |
|            | 0.3          | 0.50       | 0.48 | 0.58 | 0.51 | 0.50 | 0.49 | 0.49 | 0.50 | 0.46 | 0.56 |
|            | 0.6          | 0.67       | 0.65 | 0.74 | 0.71 | 0.67 | 0.66 | 0.69 | 0.64 | 0.67 | 0.71 |
| Strategy 4 | 0.1          | 0.31       | 0.25 | 0.34 | 0.25 | 0.26 | 0.27 | 0.30 | 0.24 | 0.24 | 0.31 |
|            | 0.3          | 0.51       | 0.44 | 0.51 | 0.48 | 0.47 | 0.48 | 0.47 | 0.44 | 0.43 | 0.51 |
|            | 0.6          | 0.64       | 0.61 | 0.71 | 0.67 | 0.62 | 0.65 | 0.64 | 0.60 | 0.60 | 0.65 |

Table 2. Accuracies of predict of single breed reference (PWC).

| Trait      | Heritability | Validation |       |       |       |             |      |       |      |       |       |
|------------|--------------|------------|-------|-------|-------|-------------|------|-------|------|-------|-------|
|            |              | CDMC       | XZC   | MGC   | YHC   | PWC         | LSC  | ZTC   | HNC  | NDC   | WSC   |
| Strategy 1 | 0.1          | 0.05       | 0.05  | -0.04 | 0.03  | <b>0.28</b> | 0.06 | -0.01 | 0.03 | 0.10  | 0.02  |
|            | 0.3          | 0.07       | 0.07  | 0.08  | 0.07  | <b>0.51</b> | 0.10 | 0.06  | 0.13 | 0.12  | -0.01 |
|            | 0.6          | 0.11       | 0.06  | 0.04  | 0.07  | <b>0.67</b> | 0.11 | 0.05  | 0.12 | 0.16  | 0.06  |
| Strategy 2 | 0.1          | 0.07       | 0.02  | 0.04  | -0.01 | <b>0.35</b> | 0.04 | 0.01  | 0.04 | 0.02  | 0.07  |
|            | 0.3          | 0.09       | 0.06  | 0.05  | 0.01  | <b>0.47</b> | 0.02 | 0.07  | 0.02 | 0.08  | 0.08  |
|            | 0.6          | 0.05       | 0.00  | 0.05  | 0.02  | <b>0.64</b> | 0.09 | 0.06  | 0.04 | 0.07  | 0.13  |
| Strategy 3 | 0.1          | -0.02      | 0.04  | 0.03  | 0.02  | <b>0.31</b> | 0.06 | -0.03 | 0.09 | 0.03  | 0.00  |
|            | 0.3          | 0.01       | 0.02  | 0.12  | 0.01  | <b>0.50</b> | 0.05 | 0.03  | 0.06 | 0.10  | 0.09  |
|            | 0.6          | 0.06       | 0.04  | 0.09  | 0.04  | <b>0.67</b> | 0.09 | 0.06  | 0.08 | 0.10  | 0.09  |
| Strategy 4 | 0.1          | 0.00       | -0.03 | 0.03  | 0.03  | <b>0.26</b> | 0.07 | 0.01  | 0.07 | 0.05  | 0.06  |
|            | 0.3          | 0.04       | 0.06  | 0.04  | 0.02  | <b>0.47</b> | 0.09 | 0.08  | 0.07 | -0.06 | 0.04  |
|            | 0.6          | 0.04       | 0.02  | 0.03  | 0.04  | <b>0.62</b> | 0.12 | 0.05  | 0.07 | 0.03  | 0.07  |

Table 3. Accuracies of predict with combind reference of NCC group (CDMC, XZC, MGC and YHC).

| Trait      | Heritability | Validation |      |      |      |      |      |      |      |      |      |
|------------|--------------|------------|------|------|------|------|------|------|------|------|------|
|            |              | CDMC       | XZC  | MGC  | YHC  | PWC  | LSC  | ZTC  | HNC  | NDC  | WSC  |
| Strategy 1 | 0.1          | 0.17       | 0.12 | 0.14 | 0.14 | 0.02 | 0.04 | 0.03 | 0.02 | 0.02 | 0.00 |
|            | 0.3          | 0.27       | 0.27 | 0.28 | 0.28 | 0.00 | 0.08 | 0.09 | 0.04 | 0.01 | 0.05 |
|            | 0.6          | 0.40       | 0.37 | 0.42 | 0.39 | 0.05 | 0.06 | 0.13 | 0.09 | 0.04 | 0.10 |
| Strategy 2 | 0.1          | 0.15       | 0.19 | 0.21 | 0.13 | 0.02 | 0.05 | 0.10 | 0.07 | 0.03 | 0.09 |
|            | 0.3          | 0.26       | 0.28 | 0.26 | 0.23 | 0.05 | 0.06 | 0.05 | 0.08 | 0.07 | 0.03 |
|            | 0.6          | 0.40       | 0.35 | 0.41 | 0.39 | 0.12 | 0.10 | 0.08 | 0.09 | 0.08 | 0.05 |
| Strategy 3 | 0.1          | 0.16       | 0.08 | 0.21 | 0.19 | 0.08 | 0.05 | 0.02 | 0.10 | 0.00 | 0.01 |

|            |     |      |      |      |      |       |      |      |      |      |      |
|------------|-----|------|------|------|------|-------|------|------|------|------|------|
|            | 0.3 | 0.23 | 0.28 | 0.32 | 0.31 | 0.15  | 0.06 | 0.04 | 0.10 | 0.02 | 0.05 |
|            | 0.6 | 0.41 | 0.39 | 0.44 | 0.40 | 0.16  | 0.04 | 0.05 | 0.14 | 0.04 | 0.07 |
| Strategy 4 | 0.1 | 0.16 | 0.11 | 0.20 | 0.13 | -0.02 | 0.03 | 0.04 | 0.03 | 0.05 | 0.00 |
|            | 0.3 | 0.24 | 0.23 | 0.31 | 0.29 | 0.06  | 0.05 | 0.05 | 0.02 | 0.08 | 0.08 |
|            | 0.6 | 0.38 | 0.31 | 0.41 | 0.40 | 0.05  | 0.07 | 0.13 | 0.06 | 0.08 | 0.08 |

Table 4. Accuracies of predict with combind reference of SWC group (PWC, LSC and ZTC).

| Trait      | Heritability | Validation |       |      |      |      |      |      |      |       |      |
|------------|--------------|------------|-------|------|------|------|------|------|------|-------|------|
|            |              | CDMC       | XZC   | MGC  | YHC  | PWC  | LSC  | ZTC  | HNC  | NDC   | WSC  |
| Strategy 1 | 0.1          | 0.10       | 0.03  | 0.01 | 0.08 | 0.17 | 0.25 | 0.22 | 0.01 | 0.04  | 0.09 |
|            | 0.3          | 0.09       | 0.11  | 0.08 | 0.05 | 0.34 | 0.41 | 0.33 | 0.11 | 0.06  | 0.05 |
|            | 0.6          | 0.14       | 0.09  | 0.09 | 0.08 | 0.52 | 0.54 | 0.52 | 0.18 | 0.13  | 0.17 |
| Strategy 2 | 0.1          | 0.04       | 0.01  | 0.06 | 0.01 | 0.23 | 0.19 | 0.16 | 0.07 | 0.02  | 0.05 |
|            | 0.3          | 0.04       | -0.02 | 0.08 | 0.09 | 0.37 | 0.37 | 0.35 | 0.10 | 0.10  | 0.10 |
|            | 0.6          | 0.03       | 0.01  | 0.09 | 0.11 | 0.50 | 0.54 | 0.49 | 0.11 | 0.10  | 0.14 |
| Strategy 3 | 0.1          | 0.01       | 0.02  | 0.03 | 0.01 | 0.24 | 0.20 | 0.22 | 0.04 | 0.05  | 0.00 |
|            | 0.3          | 0.06       | 0.03  | 0.06 | 0.01 | 0.36 | 0.38 | 0.43 | 0.09 | 0.10  | 0.13 |
|            | 0.6          | 0.06       | 0.09  | 0.06 | 0.04 | 0.52 | 0.54 | 0.54 | 0.09 | 0.11  | 0.15 |
| Strategy 4 | 0.1          | 0.08       | -0.07 | 0.03 | 0.03 | 0.21 | 0.23 | 0.27 | 0.01 | -0.02 | 0.05 |
|            | 0.3          | 0.09       | 0.03  | 0.07 | 0.03 | 0.36 | 0.39 | 0.35 | 0.11 | 0.02  | 0.08 |
|            | 0.6          | 0.13       | 0.02  | 0.07 | 0.09 | 0.50 | 0.52 | 0.51 | 0.11 | 0.07  | 0.17 |

Table 5. Accuracies of predict with combind reference of SCHC group (HNC, NDC and WSC).

| Trait      | Heritability | Validation |       |      |      |       |      |      |      |      |      |
|------------|--------------|------------|-------|------|------|-------|------|------|------|------|------|
|            |              | CDMC       | XZC   | MGC  | YHC  | PWC   | LSC  | ZTC  | HNC  | NDC  | WSC  |
| Strategy 1 | 0.1          | 0.10       | 0.02  | 0.03 | 0.03 | 0.01  | 0.05 | 0.04 | 0.24 | 0.16 | 0.27 |
|            | 0.3          | 0.03       | 0.03  | 0.11 | 0.01 | 0.06  | 0.09 | 0.05 | 0.38 | 0.31 | 0.40 |
|            | 0.6          | 0.07       | 0.07  | 0.11 | 0.03 | 0.13  | 0.13 | 0.08 | 0.50 | 0.51 | 0.55 |
| Strategy 2 | 0.1          | 0.02       | 0.03  | 0.00 | 0.03 | 0.04  | 0.06 | 0.00 | 0.16 | 0.21 | 0.20 |
|            | 0.3          | 0.04       | -0.01 | 0.03 | 0.10 | 0.10  | 0.02 | 0.09 | 0.33 | 0.36 | 0.36 |
|            | 0.6          | 0.08       | 0.02  | 0.09 | 0.10 | 0.12  | 0.11 | 0.11 | 0.46 | 0.50 | 0.48 |
| Strategy 3 | 0.1          | 0.04       | 0.01  | 0.06 | 0.01 | 0.01  | 0.07 | 0.05 | 0.21 | 0.19 | 0.25 |
|            | 0.3          | -0.01      | 0.04  | 0.05 | 0.01 | 0.02  | 0.11 | 0.08 | 0.40 | 0.36 | 0.41 |
|            | 0.6          | 0.07       | 0.04  | 0.03 | 0.04 | 0.07  | 0.16 | 0.09 | 0.52 | 0.48 | 0.58 |
| Strategy 4 | 0.1          | 0.08       | -0.04 | 0.02 | 0.04 | -0.03 | 0.04 | 0.03 | 0.14 | 0.23 | 0.28 |
|            | 0.3          | 0.07       | 0.05  | 0.03 | 0.01 | 0.06  | 0.14 | 0.09 | 0.32 | 0.31 | 0.40 |
|            | 0.6          | 0.11       | 0.06  | 0.08 | 0.04 | 0.08  | 0.09 | 0.10 | 0.44 | 0.46 | 0.52 |

Table 6. Accuracies of predict with combind reference among group (XZC, LSC and HNC).

| Trait | Heritability | Validation |     |     |     |     |     |     |     |     |     |
|-------|--------------|------------|-----|-----|-----|-----|-----|-----|-----|-----|-----|
|       |              | CDMC       | XZC | MGC | YHC | PWC | LSC | ZTC | HNC | NDC | WSC |

|            |     |       |      |       |      |       |      |      |      |      |       |
|------------|-----|-------|------|-------|------|-------|------|------|------|------|-------|
| Strategy 1 | 0.1 | -0.01 | 0.12 | 0.03  | 0.02 | 0.07  | 0.15 | 0.03 | 0.16 | 0.03 | 0.03  |
|            | 0.3 | 0.04  | 0.26 | -0.01 | 0.06 | 0.05  | 0.26 | 0.06 | 0.29 | 0.10 | 0.02  |
|            | 0.6 | 0.05  | 0.36 | 0.08  | 0.10 | 0.11  | 0.37 | 0.15 | 0.40 | 0.07 | 0.08  |
| Strategy 2 | 0.1 | 0.03  | 0.18 | -0.01 | 0.04 | 0.04  | 0.11 | 0.04 | 0.18 | 0.02 | 0.04  |
|            | 0.3 | 0.02  | 0.28 | 0.03  | 0.06 | 0.03  | 0.25 | 0.02 | 0.26 | 0.09 | 0.02  |
|            | 0.6 | 0.06  | 0.35 | 0.09  | 0.09 | 0.08  | 0.39 | 0.06 | 0.33 | 0.13 | 0.13  |
| Strategy 3 | 0.1 | 0.08  | 0.09 | 0.01  | 0.04 | 0.09  | 0.19 | 0.02 | 0.15 | 0.00 | 0.06  |
|            | 0.3 | 0.08  | 0.27 | 0.00  | 0.06 | 0.13  | 0.29 | 0.01 | 0.25 | 0.03 | 0.14  |
|            | 0.6 | 0.07  | 0.38 | 0.04  | 0.08 | 0.10  | 0.39 | 0.01 | 0.39 | 0.02 | 0.11  |
| Strategy 4 | 0.1 | 0.02  | 0.11 | 0.04  | 0.06 | -0.02 | 0.16 | 0.04 | 0.13 | 0.03 | -0.02 |
|            | 0.3 | 0.03  | 0.23 | 0.05  | 0.05 | 0.05  | 0.31 | 0.04 | 0.19 | 0.03 | 0.06  |
|            | 0.6 | 0.08  | 0.31 | 0.08  | 0.06 | 0.07  | 0.36 | 0.10 | 0.36 | 0.07 | 0.11  |

Table 7. Accuracies of predict with combind ten breeds reference.

| Trait      | Heritability | Validation |      |      |      |      |      |      |      |      |      |
|------------|--------------|------------|------|------|------|------|------|------|------|------|------|
|            |              | CDMC       | XZC  | MGC  | YHC  | PWC  | LSC  | ZTC  | HNC  | NDC  | WSC  |
| Strategy 1 | 0.1          | 0.12       | 0.08 | 0.09 | 0.09 | 0.09 | 0.13 | 0.12 | 0.11 | 0.09 | 0.15 |
|            | 0.3          | 0.17       | 0.18 | 0.18 | 0.25 | 0.15 | 0.17 | 0.17 | 0.15 | 0.21 | 0.18 |
|            | 0.6          | 0.30       | 0.26 | 0.24 | 0.27 | 0.24 | 0.24 | 0.25 | 0.26 | 0.30 | 0.27 |
| Strategy 2 | 0.1          | 0.09       | 0.12 | 0.14 | 0.11 | 0.11 | 0.06 | 0.14 | 0.06 | 0.07 | 0.11 |
|            | 0.3          | 0.22       | 0.15 | 0.16 | 0.17 | 0.15 | 0.16 | 0.14 | 0.16 | 0.20 | 0.19 |
|            | 0.6          | 0.30       | 0.24 | 0.30 | 0.25 | 0.21 | 0.25 | 0.26 | 0.21 | 0.28 | 0.30 |
| Strategy 3 | 0.1          | 0.16       | 0.12 | 0.13 | 0.09 | 0.10 | 0.15 | 0.09 | 0.12 | 0.11 | 0.11 |
|            | 0.3          | 0.17       | 0.17 | 0.22 | 0.17 | 0.15 | 0.13 | 0.17 | 0.14 | 0.15 | 0.24 |
|            | 0.6          | 0.24       | 0.27 | 0.27 | 0.29 | 0.26 | 0.24 | 0.21 | 0.25 | 0.24 | 0.29 |
| Strategy 4 | 0.1          | 0.07       | 0.12 | 0.11 | 0.09 | 0.13 | 0.09 | 0.12 | 0.12 | 0.08 | 0.08 |
|            | 0.3          | 0.16       | 0.14 | 0.21 | 0.15 | 0.20 | 0.26 | 0.14 | 0.09 | 0.15 | 0.20 |
|            | 0.6          | 0.29       | 0.21 | 0.29 | 0.25 | 0.26 | 0.26 | 0.22 | 0.18 | 0.25 | 0.20 |
